# Supplementary material
Source: PubMed Central journal article supplement (PMC2778489)
Supplement: NIHMS148860-supplement-Supplementary_Data_1.pdf [file NIHMS148860-supplement-Supplementary_Data_1.pdf]

**Table S1. Postgraduate Choices From NIH-sponsored MSTPs, Year-by-Year Breakdown**

|                                                | <b>2004</b> | <b>2005</b> | <b>2006</b> | <b>2007</b> | <b>2008</b> | <b>Total</b> |
|------------------------------------------------|-------------|-------------|-------------|-------------|-------------|--------------|
| Internal Medicine                              | 67          | 71          | 82          | 80          | 67          | <b>367</b>   |
| Pathology                                      | 26          | 31          | 25          | 34          | 38          | <b>154</b>   |
| Pediatrics                                     | 25          | 29          | 30          | 33          | 32          | <b>149</b>   |
| Diagnostic Radiology                           | 17          | 19          | 17          | 23          | 27          | <b>103</b>   |
| Dermatology                                    | 19          | 19          | 19          | 17          | 14          | <b>88</b>    |
| Radiation Oncology                             | 14          | 17          | 14          | 14          | 25          | <b>84</b>    |
| Neurology                                      | 15          | 14          | 12          | 20          | 20          | <b>81</b>    |
| Psychiatry                                     | 17          | 14          | 14          | 15          | 16          | <b>76</b>    |
| Ophthalmology                                  | 17          | 11          | 13          | 11          | 15          | <b>67</b>    |
| Anesthesiology                                 | 7           | 6           | 11          | 14          | 13          | <b>51</b>    |
| Surgery                                        | 7           | 9           | 9           | 3           | 5           | <b>33</b>    |
| Neurosurgery                                   | 6           | 7           | 5           | 5           | 5           | <b>28</b>    |
| Otolaryngology                                 | 4           | 2           | 5           | 7           | 4           | <b>22</b>    |
| Orthopaedic Surgery                            | 3           | 2           | 5           | 6           | 5           | <b>21</b>    |
| Child Neurology                                | 2           | 1           | 4           | 6           | 5           | <b>18</b>    |
| Emergency Medicine                             | 6           | 0           | 1           | 6           | 4           | <b>17</b>    |
| Obstetrics/Gynecology                          | 3           | 4           | 1           | 6           | 1           | <b>15</b>    |
| Urology                                        | 3           | 4           | 2           | 1           | 3           | <b>13</b>    |
| Medicine/Pediatrics                            | 2           | 4           | 3           | 1           | 2           | <b>12</b>    |
| Plastic Surgery                                | 1           | 2           | 1           | 2           | 0           | <b>6</b>     |
| Physical Medicine & Rehabilitation             | 0           | 1           | 0           | 1           | 3           | <b>5</b>     |
| Family Medicine                                | 1           | 0           | 1           | 1           | 1           | <b>4</b>     |
| Nuclear Medicine                               | 3           | 0           | 0           | 0           | 0           | <b>3</b>     |
| Child Psychiatry                               | 0           | 0           | 1           | 1           | 0           | <b>2</b>     |
| Medical Genetics                               | 0           | 0           | 0           | 0           | 1           | <b>1</b>     |
| Medicine/Neurology                             | 1           | 0           | 0           | 0           | 0           | <b>1</b>     |
| Neurology/Psychiatry                           | 0           | 0           | 1           | 0           | 0           | <b>1</b>     |
| Preliminary/Transitional Only (All Specialties | 0           | 1           | 0           | 2           | 4           | <b>7</b>     |
| <b>TOTAL</b>                                   | <b>266</b>  | <b>268</b>  | <b>276</b>  | <b>309</b>  | <b>310</b>  | <b>1429</b>  |
| Postdoctoral Fellowship/Research               | 8           | 10          | 3           | 10          | 9           | <b>40</b>    |
| Faculty Position                               | 0           | 1           | 2           | 2           | 1           | <b>6</b>     |
| Business/Industry/Consulting                   | 3           | 2           | 3           | 4           | 3           | <b>15</b>    |
| Other                                          | 0           | 3           | 0           | 2           | 0           | <b>5</b>     |
| <b>TOTAL</b>                                   | <b>11</b>   | <b>16</b>   | <b>8</b>    | <b>18</b>   | <b>13</b>   | <b>66</b>    |
| <i>Primary Care Specialties</i>                | 98          | 105         | 121         | 122         | 107         | <b>553</b>   |
| <i>Surgical Specialties</i>                    | 41          | 37          | 40          | 35          | 37          | <b>190</b>   |
| <i>Other Specialties</i>                       | 127         | 125         | 115         | 150         | 162         | <b>679</b>   |
