# Supplementary material
Source: PubMed Central journal article supplement (PMC2778489)
Supplement: NIHMS148860-supplement-Supplementary_Data_2.pdf [file NIHMS148860-supplement-Supplementary_Data_2.pdf]

**Table 2. Matches From NIH-sponsored MSTPs, Top 10 Ranked by Location**

|                                          | <b>2004</b> | <b>2005</b> | <b>2006</b> | <b>2007</b> | <b>2008</b> | <b>Total</b> | <b>RR</b> | <b>95% CI</b> | <b>p-value</b> |
|------------------------------------------|-------------|-------------|-------------|-------------|-------------|--------------|-----------|---------------|----------------|
| Harvard University                       | 40          | 52          | 48          | 55          | 53          | <b>248</b>   | 4.71      | 4.15 - 5.35   | <0.0001        |
| University of California - San Francisco | 17          | 12          | 20          | 29          | 22          | <b>100</b>   | 4.71      | 3.81 - 5.82   | <0.0001        |
| University of Pennsylvania               | 15          | 17          | 22          | 25          | 14          | <b>93</b>    | 4.36      | 3.51 - 5.43   | <0.0001        |
| Washington University                    | 15          | 13          | 14          | 18          | 17          | <b>77</b>    | 3.94      | 3.10 - 5.00   | <0.0001        |
| Stanford University                      | 14          | 14          | 13          | 18          | 15          | <b>74</b>    | 4.76      | 3.74 - 6.05   | <0.0001        |
| Johns Hopkins University                 | 16          | 8           | 15          | 11          | 10          | <b>60</b>    | 2.86      | 2.11 - 3.86   | <0.0001        |
| Yale University                          | 5           | 14          | 5           | 9           | 13          | <b>46</b>    | 2.79      | 2.05 - 3.80   | <0.0001        |
| University of Washington                 | 7           | 10          | 10          | 11          | 7           | <b>45</b>    | 2.58      | 1.90 - 3.50   | <0.0001        |
| University of Michigan                   | 9           | 8           | 5           | 6           | 9           | <b>37</b>    | 2.25      | 1.63 - 3.11   | <0.0001        |
| University of California - Los Angeles   | 13          | 7           | 1           | 4           | 11          | <b>36</b>    | 2.16      | 1.51 - 3.08   | <0.0001        |

RR & 95% CI calculated only for NRMP matches: comparative data for SFMatch and Urology Match were not available for comparison by institution.

Preliminary/Transitional matches not included in analysis.
