# Supplementary material
Source: PubMed Central journal article supplement (PMC2778489)
Supplement: NIHMS148860-supplement-Supplementary_Data_3.pdf [file NIHMS148860-supplement-Supplementary_Data_3.pdf]

**Table S3. Selected Top Programs in Specialties**

|                                          |    |                                          |    |
|------------------------------------------|----|------------------------------------------|----|
| <b>Anesthesiology</b>                    |    | <b>Pathology</b>                         |    |
| University of California - San Francisco | 7  | Brigham & Women's Hospital               | 21 |
|                                          |    | University of California - San Francisco | 17 |
| <b>Dermatology</b>                       |    | Massachusetts General Hospital           | 15 |
| Stanford University                      | 8  | University of Pennsylvania               | 15 |
| University of Michigan                   | 7  | <b>Pediatrics</b>                        |    |
| New York University                      | 7  | Children's Hospital Boston               | 28 |
| <b>Internal Medicine</b>                 |    | Children's Hospital of Philadelphia      | 22 |
| Brigham & Women's Hospital               | 51 | University of California - San Francisco | 12 |
| Massachusetts General Hospital           | 29 | <b>Psychiatry</b>                        |    |
| Washington University                    | 22 | Massachusetts General Hospital           | 8  |
| Stanford University                      | 22 | Cornell University                       | 7  |
| University of California - San Francisco | 16 | Columbia University                      | 7  |
| Johns Hopkins University                 | 16 | University of California - San Francisco | 7  |
| <b>Neurology</b>                         |    | <b>Radiation Oncology</b>                |    |
| Harvard University                       | 22 | Harvard University                       | 14 |
| University of California - San Francisco | 11 | MD Anderson Cancer Center                | 12 |
| University of Pennsylvania               | 10 | <b>Radiology</b>                         |    |
| <b>Ophthalmology</b>                     |    | Stanford University                      | 11 |
| Johns Hopkins University                 | 11 | University of California - San Francisco | 10 |
| Harvard University                       | 8  | Washington University                    | 10 |
